# Supplementary material for: Long non-coding RNA HOTTIP promotes BCL-2 expression and induces chemoresistance in small cell lung cancer by sponging miR-216a
Source: PubMed Central journal article supplement (PMC5833383; doi:10.1038/s41419-017-0113-5), 2018-01-24
Supplement: 41419_2017_113_MOESM5_ESM.pdf [file 41419_2017_113_MOESM5_ESM.pdf]

## Supplementary Table legends

Table 1. Differentially expressed genes in HOX gene family.

Table 2. Association of HOXA13 expression and clinical parameters.

Table 3. Differentially expressed miRNAs in H69/H69AR cells.

Table 4. Mass spectrometry analysis of the proteins pulled down by HOTTIP.

### Primers:

HOTTIP Foward Primer(5'-3'): CCTAAAGCCACGCTTCTTTG

HOTTIP Reverse Primer(5'-3'): TGCAGGCTGGAGATCCTACT

HOXA13 Foward Primer(5'-3'): CTGCCCTATGGCTACTTCGG

HOXA13 Reverse Primer(5'-3'): CCGGCGGTATCCATGTACT

BCL-2 Foward Primer(5'-3'): GAACTGGGGGAGGATTGTGG

BCL-2 Reverse Primer(5'-3'): CCGTACAGTTCCACAAAGGC

miR-216a RT Primer(5'-3'): CTCAACTGGTGTCGTGGA

miR-216a Forward Primer(5'-3'): TGTCGCAAATCTCTGCAGG

miR-216a Reverse Primer(5'-3'): CAGAGCAGGGTCCGAGGTA

HOXA11 Foward Primer(5'-3'): TGCCAAGTTGTACTTACTACGTC

HOXA11 Reverse Primer(5'-3'): GTTGGAGGAGTAGGAGTATGTCA

HOXA10 Foward Primer(5'-3'): CTCGCCCATAGACCTGTGG

HOXA10 Reverse Primer(5'-3'): GTTCTGCGCGAAAGAGCAC

HOXA9 Foward Primer(5'-3'): TACGTGGACTCGTTCCTGCT

HOXA9 Reverse Primer(5'-3'): CGTCGCCTTGGACTGGAAG

HOXA7 Forward Primer(5'-3'): GCATAAGGACGAAGGTCCGA

HOXA7 Reverse Primer(5'-3'): AGACGCTTTTCCGACTGTCC

HOXA6 Forward Primer(5'-3'): TCCCGGACAAGACGTACAC

HOXA6 Reverse Primer(5'-3'): CGCCACTGAGGTCCTTATCA

HOXA3 Forward Primer(5'-3'): ATGCAAAAAGCGACCTACTACG

HOXA3 Reverse Primer(5'-3'): TACGGCTGCTGATTGGCATTAA

HOXA2 Forward Primer(5'-3'): CCCCTGTCGCTGATACATTTC

HOXA2 Reverse Primer(5'-3'): TGGTCTGCTCAAAGGAGGAG

HOXA1 Forward Primer(5'-3'): TCCTGGAATACCCATACTTAGC

HOXA1 Reverse Primer(5'-3'): GCACGACTGGAAAGTTGTAATCC

GAPDH Forward Primers(5'-3'): GGGCTGCTTTTAACTCTG

GAPDH Reverse Primers(5'-3'): TGGCAGGTTTTTCTAGACGG

### **siRNA and shRNA sequences:**

si-h-HOTTIP-1:

(positive-sense, 5'-3'): GCUGCUUUAGAGCCACAUA dTdT

(negative-sense, 3'-5'): dTdT CGACGAAAUCUCGGUGUAU

si-h-HOTTIP-2:

(positive-sense, 5'-3'): CCAGCUGCGAAUUCUAAU dTdT

(negative-sense, 3'-5'):dTdT GGUCGACGCUUAAGAAUUA

si-h-HOTTIP-3:

(positive-sense, 5'-3'):CCUUGAUAUGCACGCAUUAU dTdT

(negative-sense, 3'-5'): dTdT GGAACUAUACGUGCGUAUA

HOTTIP lentivirus vector (si-h-HOTTIP-1 was packaged by LV3 lentivirus vector):

Vector type: LV3 (H1/GFP&Puro) sequence: 5' GCUGCUUUAGAGCCACAUA dTdT 3'

si-HOXA13-1(sense, 5'-3'): 5'-AAUGUAUUUGUGCACCU GCuTdT-3'

si-HOXA13-2(sense, 5'-3'): 5'/5fam/-CCG UCAUGUUUCUCUCUACGAdTdT-3'

### miRNA mimics and inhibitor sequences:

HmiR-216a-FO: TGTCGCAAATCTCTGCAGG

HmiR-RE-6: CAGAGCAGGGTCCGAGGTA

### Sequencing results of pcDNA3.1-HOTTIP expression:

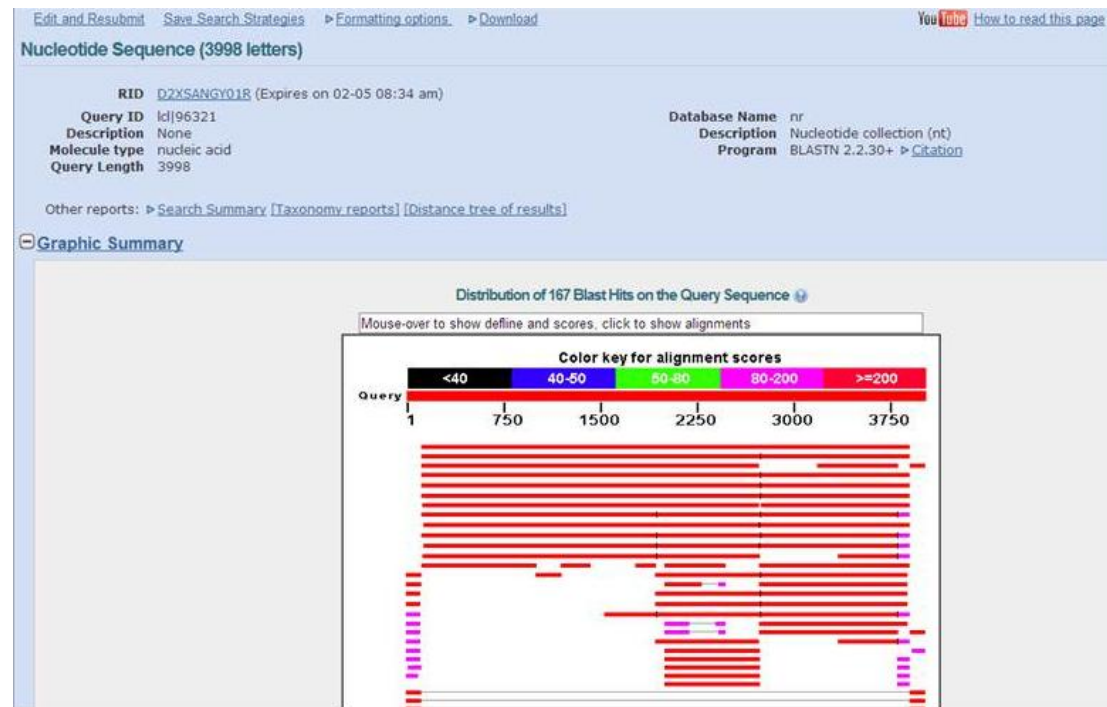

Descriptions

Sequences producing significant alignments:

Select: All None Selected 0

Alignments Download GenBank Graphics Distance tree of results

| Description                                                                                  | Max score | Total score | Query cover | E value | Ident | Accession   |
|----------------------------------------------------------------------------------------------|-----------|-------------|-------------|---------|-------|-------------|
| Homo sapiens HoxA transcript at the distal tip RNA antisense RNA (HOTTIP), complete sequence | 6892      | 6892        | 94%         | 0.0     | 99%   | GU724873.1  |
| Homo sapiens HOXA distal transcript antisense RNA (HOTTIP), long non-coding RNA              | 4771      | 6893        | 94%         | 0.0     | 99%   | NR_037843.3 |
| TPA Homo sapiens long non-coding RNA OTTHUMT00000475157.1 (HOTTIP gene), antisense           | 4759      | 4759        | 65%         | 0.0     | 99%   | LK939039.1  |
| PREDICTED_Pan troglodytes uncharacterized LOC100515921 (LOC100515921), ncRNA                 | 4649      | 6716        | 93%         | 0.0     | 99%   | XR_129782.2 |
| PREDICTED_Pan paniscus uncharacterized LOC103784322 (LOC103784322), ncRNA                    | 4636      | 6714        | 93%         | 0.0     | 99%   | XR_609945.1 |
| PREDICTED_Pongo abelii uncharacterized LOC100935717 (LOC100935717), ncRNA                    | 4412      | 6284        | 94%         | 0.0     | 97%   | XR_150580.2 |
| PREDICTED_Rhinopithecus roxellana uncharacterized LOC104681882 (LOC104681882), ncRNA         | 3956      | 5660        | 93%         | 0.0     | 94%   | XR_750626.1 |
| Homo sapiens PAC clone RP1-170019 from 7p15-p21, complete sequence                           | 3312      | 6912        | 94%         | 0.0     | 99%   | AC004080.2  |
| PREDICTED_Saimiri boliviensis boliviensis uncharacterized LOC104652505 (LOC104652505), ncRNA | 3295      | 4580        | 93%         | 0.0     | 90%   | XR_745822.1 |
| Pan troglodytes BAC clone CH251-489A6 from chromosome 7, complete sequence                   | 3223      | 6735        | 93%         | 0.0     | 99%   | AC161061.2  |
| Papio hamadryas chromosome clone RP41-155J24, complete sequence                              | 2660      | 5662        | 93%         | 0.0     | 94%   | AC116608.1  |
| PREDICTED_Callithrix jacchus uncharacterized LOC103794759 (LOC103794759), ncRNA              | 2244      | 3392        | 64%         | 0.0     | 89%   | XR_622194.1 |
| TPA Homo sapiens long non-coding RNA OTTHUMT00000475156.1 (HOTTIP gene), antisense           | 2119      | 2119        | 28%         | 0.0     | 99%   | LK939038.1  |
| TPA Homo sapiens long non-coding RNA OTTHUMT00000469690.1 (HOTTIP gene), antisense           | 2102      | 3571        | 48%         | 0.0     | 99%   | HG500135.1  |
| TPA Homo sapiens long non-coding RNA OTTHUMT00000414180.2 (HOTTIP gene), antisense           | 2102      | 2102        | 28%         | 0.0     | 99%   | HG500134.1  |
| Homo sapiens cDNA FLJ36668 fis, clone UTERU2003926                                           | 2097      | 3575        | 48%         | 0.0     | 99%   | AK093987.1  |
| PREDICTED_Gorilla gorilla gorilla uncharacterized LOC101151556 (LOC101151556), misc. RNA     | 2017      | 3409        | 48%         | 0.0     | 98%   | XR_175035.1 |
| Homo sapiens homeobox A13 (HOXA13), RefSeqGene on chromosome 7                               | 1951      | 4336        | 58%         | 0.0     | 99%   | NG_008181.1 |

### Plasmids sequencing map:

PSICHECK2.0- H -Bcl2-WT:

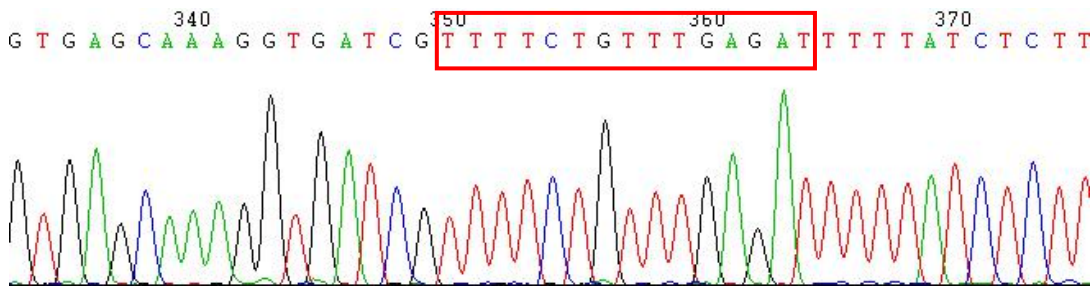

PSICHECK2.0- H - Bcl2 -Mut:

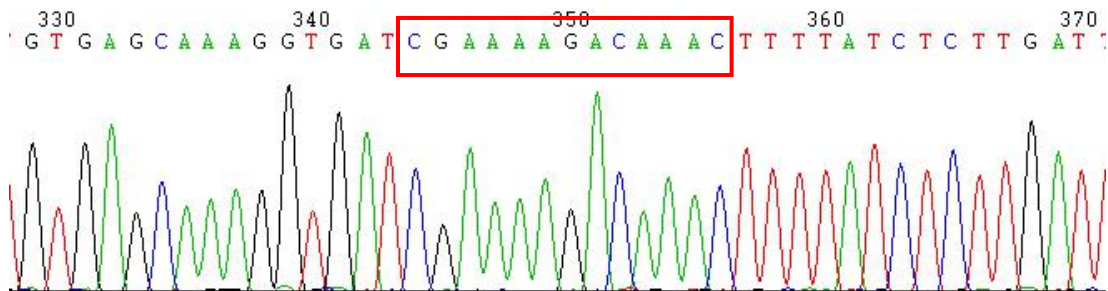

PSICHECK2.0- H -hottip-WT:

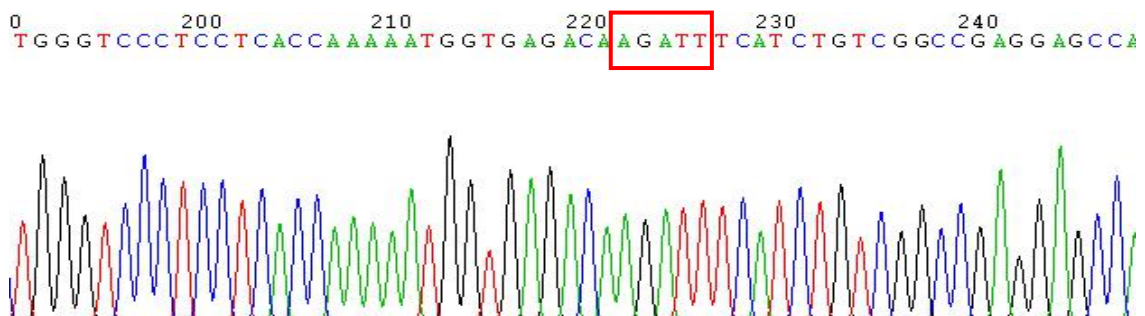

PSICHECK2.0- H -hottip-Mut:

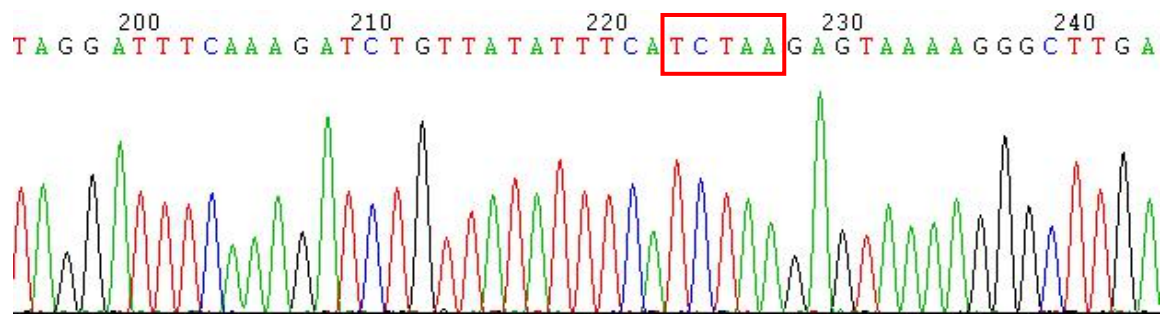

**Antibodies information:**

Rabbit anti-human HOXA13 monoclonal antibody (Abcam, ab175383)

Rabbit anti-human monoclonal antibody Bcl-2 (Santa Cruz Biotechnology, #5284)
